# Supplementary figures and images for: Transcriptomic Analysis Reveals CBF-Dependent and CBF-Independent Pathways under Low-Temperature Stress in Teak (Tectona grandis)
Source: MDPI journal article supplement (doi:10.3390/genes14112098), 2023-11-18

## Supplementary Materials

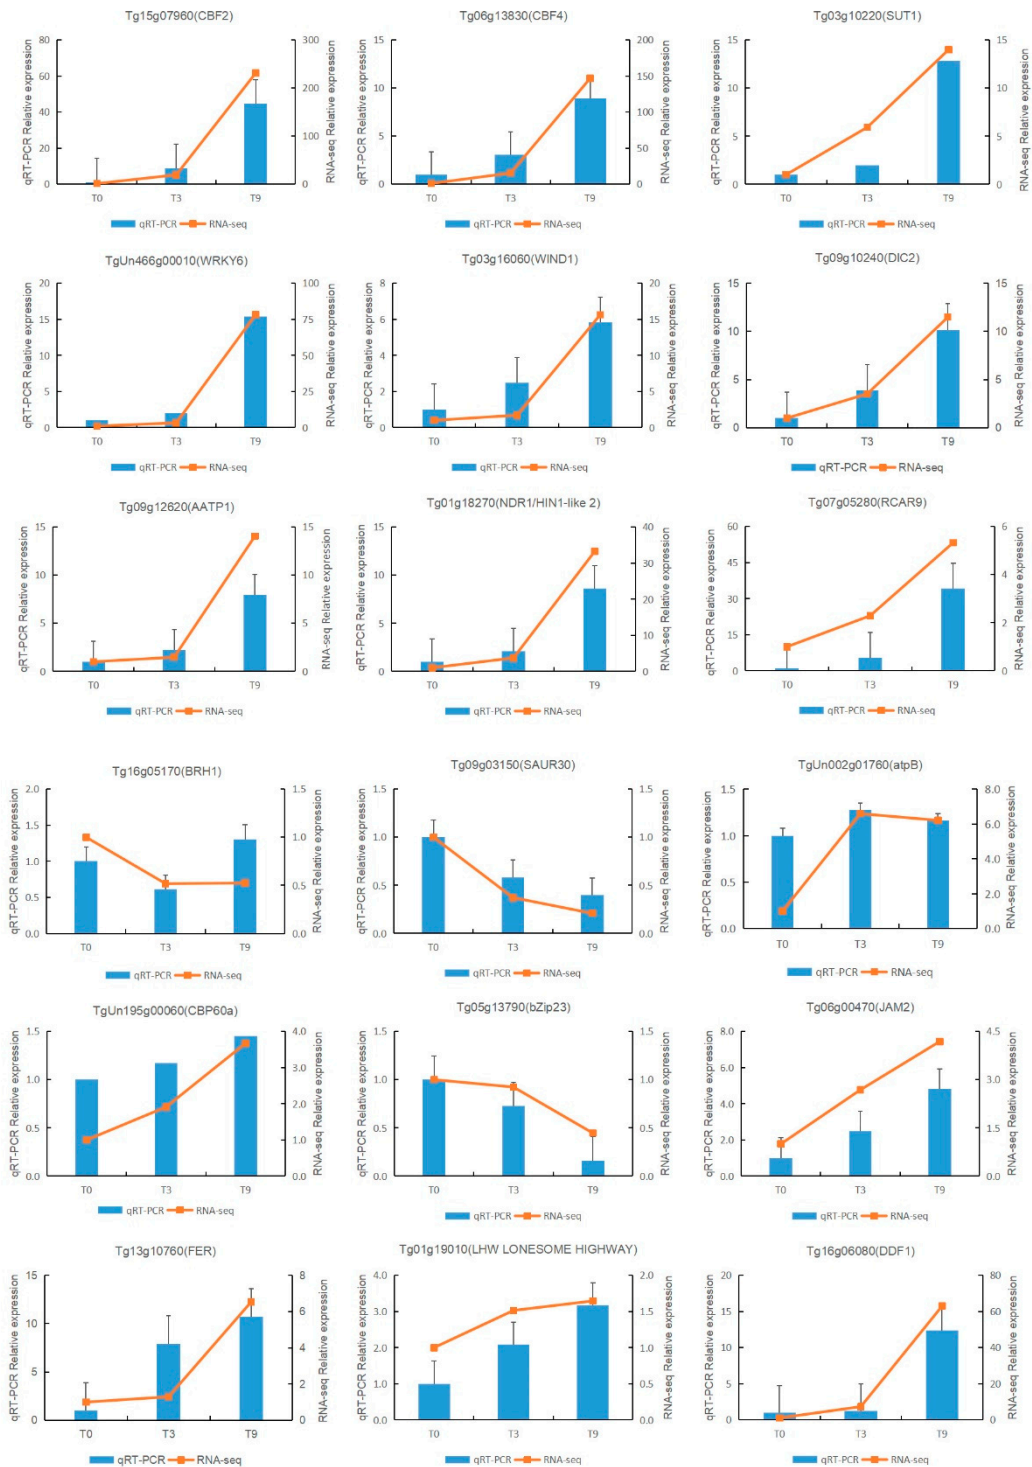

Figure S1. Validation of DEGs by qPCR.

Supplement: s1 [file s1]
